# Supplementary material for: Rac1‐mediated sustained β4 integrin level develops reattachment ability of breast cancer cells after anchorage loss
Source: PubMed Central journal article supplement — Cancer Sci. 2021 Jun 16;112(8):3205–17. doi: 10.1111/cas.14985 (PMC8353950; doi:10.1111/cas.14985), 2021-06-16
Supplement: CAS-112-3205-s001.pdf [file CAS-112-3205-s001.pdf]

**Table S1.** Breast cancer cell lines used in the study

| <b>Cell line</b> | <b>ATCC number</b>    | <b>Subtype</b>    | <b>Culture medium</b>                                |
|------------------|-----------------------|-------------------|------------------------------------------------------|
| T47D             | HTB-133 <sup>TM</sup> | Luminal A         | RPMI, 10% FBS                                        |
| MCF7             | HTB-22 <sup>TM</sup>  | Luminal A         | DMEM / low glucose, 10% FBS                          |
| SKBR3            | HTB-30 <sup>TM</sup>  | HER2 positive     | MaCoy's 5a, 10% FBS                                  |
| MDA-MB-468       | HTB-132 <sup>TM</sup> | Triple negative A | RPMI, 10% FBS                                        |
| MDA-MB-436       | HTB-130 <sup>TM</sup> | Triple negative A | DMEM / high glucose,<br>10 mg/mL insulin,<br>10% FBS |
| MDA-MB-231       | HTB-26 <sup>TM</sup>  | Triple negative B | DMEM / high glucose, 10% FBS                         |
| BT-549           | HTB-122 <sup>TM</sup> | Triple negative B | RPMI, 10% FBS                                        |

**Table S2.** List of targeting sequences for shRNA and primers for qPCR

**Target sequences for shRNA**

| shRNA     | Target sequence (5' → 3' ) | Catalog number |
|-----------|----------------------------|----------------|
| shNT      | CAACAAGATGAAGAGCACCAA      | SHC002         |
| shITGβ1#2 | TACATTCTCCACATGATTTGG      | TRCN0000275082 |
| shITGβ1#3 | ATATCAGCAGTAATGCAAGGC      | TRCN0000275083 |
| shITGβ4#1 | CATAGTCGCAATACGGGTAC       | TRCN0000308077 |
| shITGβ4#5 | CAATAGGTCGGTTGTCATCG       | TRCN0000296114 |

**Primers for qPCR**

| Primer          | Sequence (5' → 3' )     |
|-----------------|-------------------------|
| β1 integrin For | TTGGATTCTCCAGAAGGTGGTT  |
| β1 integrin Rev | TCAGTGATCCACAAACTGCAACT |
| β4 integrin For | GCAGATCTCCGGTGTACACAAG  |
| β4 integrin Rev | GCTTTTTCCCGGCATTGG      |
| TBC1D2 For      | GAATCACACGGAACCGAACTG   |
| TBC1D2 Rev      | GTGAGCATCAGAACCTGTTGCT  |
| TBP For         | GCCAGGCACCACAGCTCTT     |
| TBP Rev         | CGGCAAGGGTGCAGTTG       |

**Table S3.** List of antibodies

| <b>Name of antibody</b>                             | <b>Manufacturer</b>       | <b>Catalog number</b> |
|-----------------------------------------------------|---------------------------|-----------------------|
| <b>Western blotting</b>                             |                           |                       |
| Integrin $\beta$ 1                                  | Cell Signaling Technology | 9699s                 |
| Integrin $\beta$ 3                                  | Cell Signaling Technology | 13166                 |
| Integrin $\beta$ 4                                  | Cell Signaling Technology | 14803s                |
| Rac1                                                | BD Biosciences            | 610650                |
| Cdc42                                               | BD Biosciences            | 610929                |
| FAK                                                 | Santa Cruz Biotechnology  | sc-558                |
| Phospho-FAK (Tyr397)                                | Cell Signaling Technology | 8556s                 |
| Flag                                                | Merck                     | F3040                 |
| $\alpha$ -tubulin                                   | Thermo Fisher Scientific  | 13-8000               |
| $\beta$ -actin                                      | Merck                     | A1978                 |
| GAPDH                                               | Merck                     | MAB374                |
| Mouse IgG HRP-linked antibody                       | GE Healthcare             | NA931                 |
| Rabbit IgG HRP-linked antibody                      | GE Healthcare             | NA934                 |
| <b>Flow cytometry</b>                               |                           |                       |
| APC anti-human CD29 (Integrin $\beta$ 1) antibody   | BioLegend                 | 303007                |
| FITC anti-human CD104 (Integrin $\beta$ 4) antibody | BioLegend                 | 327805                |
| APC Mouse IgG1, $\kappa$ Isotype control antibody   | BioLegend                 | 400119                |
| FITC Mouse IgG2a, $\kappa$ Isotype control antibody | BioLegend                 | 400209                |
| <b>Immunocytochemistry</b>                          |                           |                       |
| Integrin $\beta$ 4                                  | Merck                     | MAB1964               |
| LAMP1                                               | Cell Signaling Technology | 9091                  |
| Goat anti-Mouse IgG antibody, Alexa Fluor 488       | Thermo Fisher Scientific  | A-11001               |
| Goat anti-Rabbit IgG antibody, Alexa Fluor 568      | Thermo Fisher Scientific  | A-11011               |
